# Supplementary material
Source: MDPI journal article supplement (https://www.mdpi.com/2674-1334/3/2/7)
Supplement: s1 [file s1]

**Table S1.** DDH *in silico* results obtained by Type Strain Genome Server for *C. rouxii* strains compared to the closest related type strain.

| Strain  | <i>C. rouxii</i> FRC0190 <sup>T</sup> | <i>C. diphtheriae</i><br>NCTC 11397 <sup>T</sup> | <i>C. belfantii</i><br>FRC0043 <sup>T</sup> | <i>C. ulcerans</i><br>NCTC 7910 <sup>T</sup> | <i>C. silvaticum</i><br>KL0182 <sup>T</sup> | <i>C. pseudotuberculosis</i><br>ATCC 19410 <sup>T</sup> |
|---------|---------------------------------------|--------------------------------------------------|---------------------------------------------|----------------------------------------------|---------------------------------------------|---------------------------------------------------------|
| 21395   | 90.9%                                 | 49.2%                                            | 45.2%                                       | 22.3%                                        | 21.8%                                       | 21.5%                                                   |
| 58111   | 91.1%                                 | 49.2%                                            | 45.2%                                       | 22.2%                                        | 21.6%                                       | 21.5%                                                   |
| 70862   | 92.7%                                 | 48.6%                                            | 44.9%                                       | 22.1%                                        | 21.8%                                       | 21.5%                                                   |
| 70863   | 93.1%                                 | 48.6%                                            | 44.9%                                       | 22.2%                                        | 21.8%                                       | 21.5%                                                   |
| FRC0071 | 98.1%                                 | 48.6%                                            | 45.0%                                       | 22.8%                                        | 22.3%                                       | 21.7%                                                   |
| FRC0284 | 98.5%                                 | 48.6%                                            | 45.0%                                       | 22.8%                                        | 22.3%                                       | 21.7%                                                   |
| FRC0297 | 94.6%                                 | 48.7%                                            | 45.1%                                       | 22.2%                                        | 21.5%                                       | 21.5%                                                   |
| FRC0412 | 95.5%                                 | 48.6%                                            | 45.0%                                       | 22.1%                                        | 21.8%                                       | 21.4%                                                   |
| FRC0527 | 98.1%                                 | 48.7%                                            | 45.0%                                       | 23.0%                                        | 22.4%                                       | 21.7%                                                   |
| PC0230  | 90.3%                                 | 48.9%                                            | 45.0%                                       | 22.6%                                        | 22.6%                                       | 21.5%                                                   |
| PC0231  | 90.3%                                 | 48.9%                                            | 45.1%                                       | 22.6%                                        | 22.6%                                       | 21.5%                                                   |
| PC0226  | 90.3%                                 | 48.9%                                            | 45.0%                                       | 22.6%                                        | 22.6%                                       | 21.5%                                                   |
| PC0229  | 90.3%                                 | 48.9%                                            | 45.1%                                       | 22.6%                                        | 22.6%                                       | 21.5%                                                   |
| CS30    | 94.0%                                 | 48.7%                                            | 45.1%                                       | 22.1%                                        | 21.7%                                       | 21.5%                                                   |

**Table S2.** Information about the Multilocus Sequence Typing for the *C. rouxii* strains.

| Strain               | Country | Host  | ST  | <i>atpA</i> | <i>dnaE</i> | <i>dnaK</i> | <i>fusA</i> | <i>leuA</i> | <i>odhA</i> | <i>rpoB</i> |
|----------------------|---------|-------|-----|-------------|-------------|-------------|-------------|-------------|-------------|-------------|
| FRC0190 <sup>T</sup> | France  | Human | 181 | 37          | 25          | 53          | 39          | 36          | 35          | 17          |
| 21395                | Brazil  | Dog   | 918 | 37          | 75          | 113         | 39          | 112         | 21          | 17          |
| 58111                | Brazil  | Dog   | 918 | 37          | 75          | 113         | 39          | 112         | 21          | 17          |
| 70862                | Brazil  | Cat   | 899 | 37          | 25          | 91          | 26          | 61          | 21          | 17          |
| 70863                | Brazil  | Cat   | 899 | 37          | 25          | 91          | 26          | 61          | 21          | 17          |
| FRC0071              | France  | Human | 181 | 37          | 25          | 53          | 39          | 36          | 35          | 17          |
| FRC0284              | France  | Human | 181 | 37          | 25          | 53          | 39          | 36          | 35          | 17          |
| FRC0297              | France  | Human | 537 | 37          | 25          | 91          | 54          | 61          | 21          | 17          |
| FRC0412              | France  | Dog   | 538 | 37          | 25          | 113         | 66          | 72          | 35          | 17          |
| FRC0527              | France  | Human | 181 | 37          | 25          | 53          | 39          | 36          | 35          | 17          |
| PC0230               | USA     | Cat   | 74  | 20          | 14          | 31          | 26          | 22          | 21          | 17          |
| PC0231               | USA     | Cat   | 74  | 20          | 14          | 31          | 26          | 22          | 21          | 17          |
| PC0226               | USA     | Cat   | 74  | 20          | 14          | 31          | 26          | 22          | 21          | 17          |
| PC0229               | USA     | Cat   | 74  | 20          | 14          | 31          | 26          | 22          | 21          | 17          |
| CS30                 | Spain   | Human | 537 | 37          | 25          | 91          | 54          | 61          | 21          | 17          |

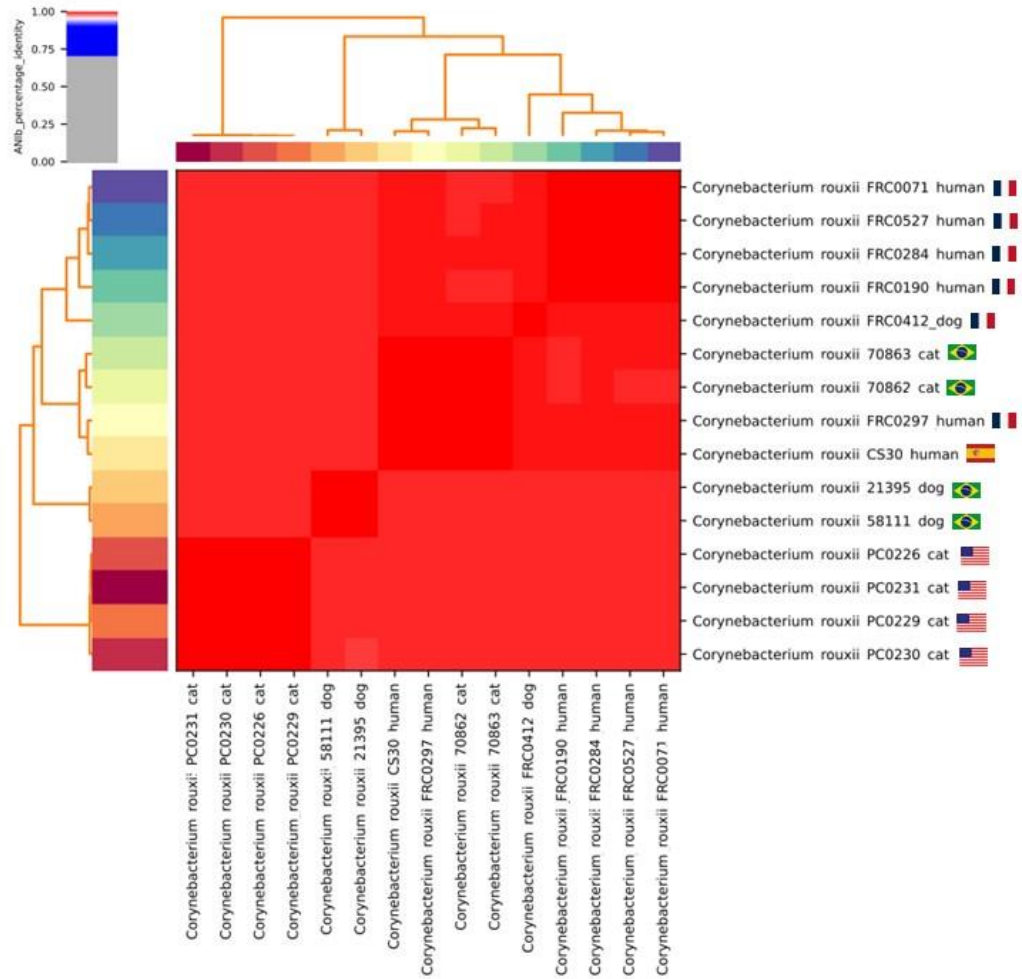

**Figure S1.** Heatmap representing the ANI percentage nucleotide identity of all matching regions between *C. rouxii* the genomes using PyANI v.0.2.12. The default scheme colors cells with identity > 0.95 as red, and those with < 0.95 as blue.

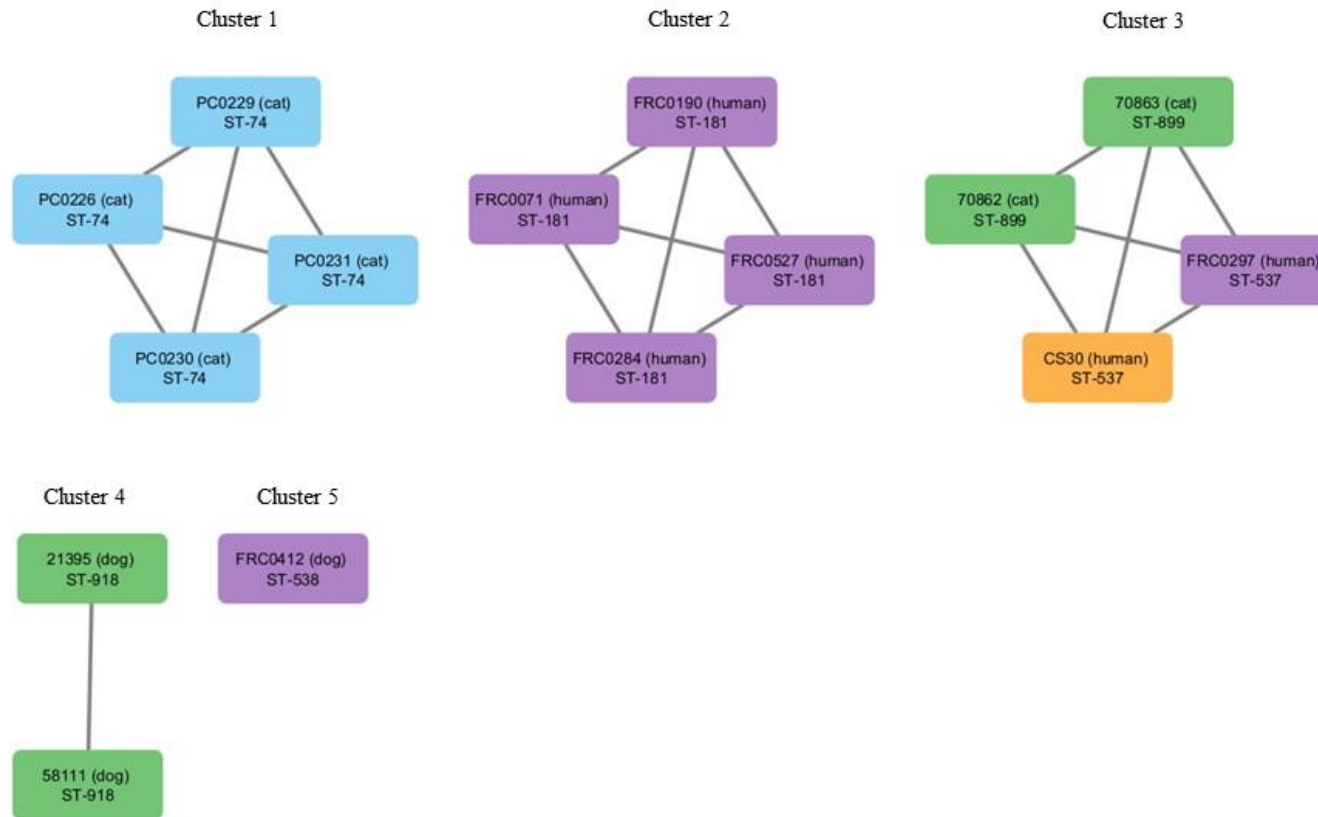

**Figure S2.** Clusters of *C. rouxii* strains genomes generated using PopPUNK v.2.6.0, in which the American samples are represented by blue color, Brazilian samples by green color, French samples by the purple color and Spanish samples by orange color.

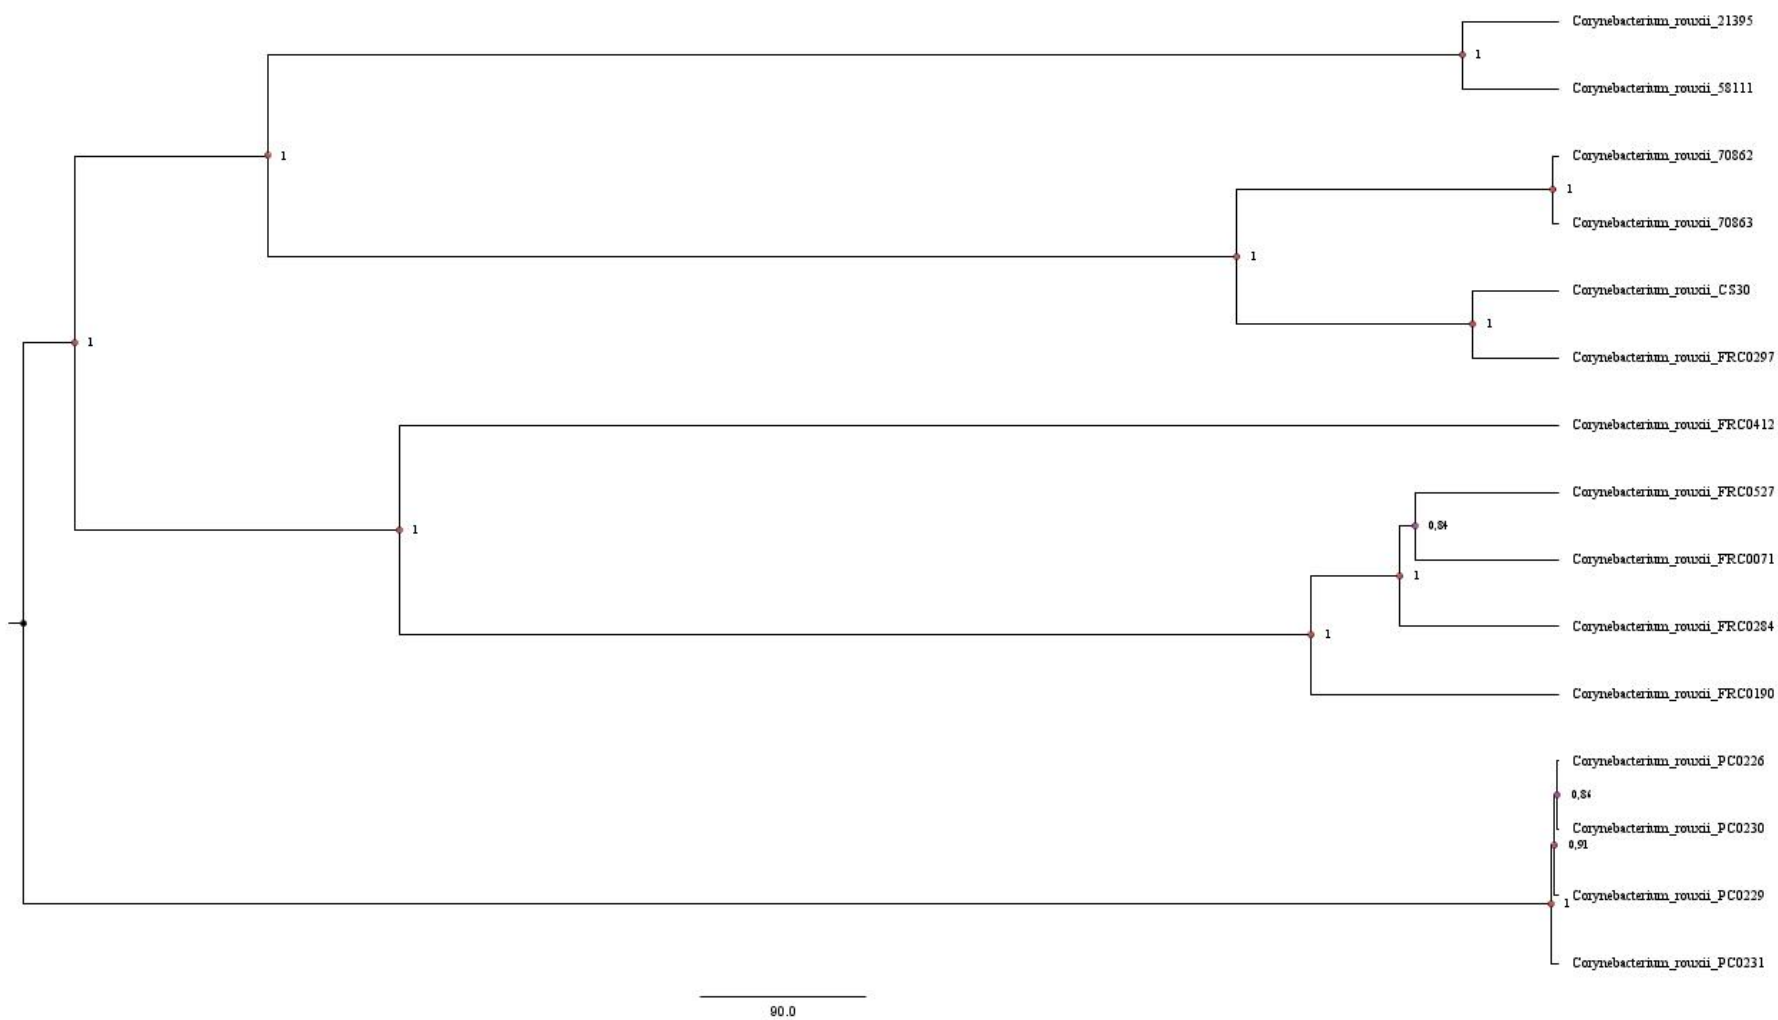

**Figure S3.** The wgMLST tree based on genomes from *C. rouxii* strains using PGADB-builder.

**Table S3.** Information about the prophage regions found in the *C. rouxii* genomes.

| Strain               | Region Length (kb) | Completeness | Score | Total Proteins | Total Hypothetical Proteins | Region Position   | Most Common Phage                        | GC%   |
|----------------------|--------------------|--------------|-------|----------------|-----------------------------|-------------------|------------------------------------------|-------|
| FRC0190 <sup>T</sup> | 34.1               | Questionable | 70    | 46             | 22                          | 170752 - 204857   | PHAGE_Coryne_Poushou_NC_042139           | 52.84 |
| FRC0190 <sup>T</sup> | 34.1               | Incomplete   | 60    | 50             | 23                          | 1280697 - 1314829 | PHAGE_Coryne_Adelaide_NC_048791          | 53.23 |
| FRC0190 <sup>T</sup> | 12.5               | Incomplete   | 10    | 17             | 4                           | 1864480 - 1877041 | PHAGE_Gordon_GMA5_NC_030907              | 58.10 |
| 21395                | 32.6               | Incomplete   | 60    | 43             | 17                          | 49791 - 82483     | PHAGE_Coryne_Poushou_NC_042139           | 52.86 |
| 21395                | 6.2                | Incomplete   | 40    | 10             | 4                           | 42225 - 48497     | PHAGE_Mycoba_Xeno_NC_031243              | 50.95 |
| 21395                | 6.8                | Incomplete   | 30    | 8              | 0                           | 100268 - 107159   | PHAGE_Paenib_Tripp_NC_028930             | 55.19 |
| 58111                | 25.3               | Intact       | 107   | 28             | 6                           | 282040 - 307345   | PHAGE_Coryne_phi673_NC_042354            | 53.50 |
| 58111                | 6.2                | Incomplete   | 40    | 10             | 4                           | 91876 - 98148     | PHAGE_Klebsi_ST13_OXA48phi12.1_NC_049453 | 50.95 |
| 70862                | 6.8                | Incomplete   | 30    | 8              | 0                           | 100778 - 107670   | PHAGE_Vibrio_VP58.5_NC_027981            | 55.20 |
| 70862                | 5.3                | Incomplete   | 40    | 8              | 2                           | 41957 - 47333     | PHAGE_Vibrio_ICP3_NC_015159              | 55.18 |
| 70863                | 6.8                | Incomplete   | 30    | 8              | 0                           | 47746 - 54638     | PHAGE_Haemop_HP1_NC_001697               | 55.20 |
| 70863                | 61.3               | Questionable | 80    | 62             | 27                          | 21866 - 83174     | PHAGE_Coryne_Poushou_NC_042139           | 53.63 |
| 70863                | 5.3                | Incomplete   | 40    | 8              | 2                           | 41957-47333       | PHAGE_Rhodoc_Sleepyhead_NC_048782        | 55.18 |
| FRC0071              | 26                 | Incomplete   | 30    | 28             | 6                           | 131649 -157694    | PHAGE_Gordon_BritBrat_NC_030942          | 54.81 |
| FRC0071              | 10                 | Incomplete   | 40    | 17             | 6                           | 161428 - 171483   | PHAGE_Rhodoc_Sleepyhead_NC_048782        | 50.92 |
| FRC0071              | 15.3               | Incomplete   | 30    | 24             | 10                          | 32868 - 48266     | PHAGE_Gordon_Nyceirae_NC_031004          | 52.31 |

|         |      |              |    |    |    |                 |                                   |       |
|---------|------|--------------|----|----|----|-----------------|-----------------------------------|-------|
| FRC0071 | 6.8  | Incomplete   | 30 | 8  | 0  | 48647 - 55538   | PHAGE_Gordon_Bowser_NC_030930     | 55.28 |
| FRC0284 | 22.3 | Incomplete   | 30 | 27 | 12 | 5959 - 28277    | PHAGE_Gordon_Nyceirae_NC_031004   | 53.04 |
| FRC0284 | 34   | Incomplete   | 60 | 40 | 20 | 33626 - 67722   | PHAGE_Coryne_Adelaide_NC_048791   | 53.23 |
| FRC0284 | 12.5 | Incomplete   | 10 | 17 | 4  | 617935 - 630495 | PHAGE_Gordon_GMA5_NC_030907       | 58.10 |
| FRC0284 | 6.8  | Incomplete   | 30 | 8  | 0  | 80324-87215     | PHAGE_Staphy_vB_SscM_1_NC_047767  | 55.28 |
| FRC0297 | 6.8  | Incomplete   | 30 | 8  | 0  | 100826 - 107718 | PHAGE_Lactoc_phiL47_NC_023574     | 55.19 |
| FRC0297 | 37.6 | Questionable | 80 | 14 | 5  | 95428 - 133076  | PHAGE_Lactoc_TP901_1_NC_002747    | 55.49 |
| FRC0412 | 6.8  | Incomplete   | 30 | 8  | 0  | 133418 - 140310 | PHAGE_Natria_PhiCh1_NC_004084     | 55.20 |
| FRC0412 | 8.9  | Incomplete   | 40 | 11 | 3  | 83381-92355     | PHAGE_Sinorh_phiM9_NC_028676      | 54.37 |
| FRC0412 | 30   | Incomplete   | 50 | 32 | 9  | 1082 - 31167    | PHAGE_Gordon_BritBrat_NC_030942   | 55.18 |
| FRC0412 | 12.5 | Incomplete   | 10 | 17 | 4  | 354837 - 367398 | PHAGE_Gordon_GMA5_NC_030907       | 58.09 |
| FRC0527 | 36.6 | Questionable | 70 | 48 | 21 | 18377 - 54988   | PHAGE_Coryne_Poushou_NC_0421395   | 52.47 |
| FRC0527 | 6.8  | Incomplete   | 30 | 8  | 0  | 130612 - 137503 | PHAGE_Natria_PhiCh1_NC_004084     | 55.28 |
| FRC0527 | 26.1 | Incomplete   | 30 | 29 | 6  | 29068 - 55174   | PHAGE_Gordon_BritBrat_NC_030942   | 54.82 |
| FRC0527 | 10.1 | Incomplete   | 40 | 17 | 6  | 58909 - 69025   | PHAGE_Rhodoc_Sleepyhead_NC_048782 | 50.92 |
| PC0230  | 39.6 | Questionable | 80 | 51 | 21 | 254169 - 293862 | PHAGE_Coryne_Poushou_NC_042139    | 52.93 |
| PC0230  | 12.5 | Incomplete   | 10 | 17 | 4  | 25885 - 38446   | PHAGE_Gordon_GMA5_NC_030907       | 58.10 |
| PC0230  | 12.6 | Incomplete   | 50 | 22 | 11 | 484 -13089      | PHAGE_Rhodoc_Sleepyhead_NC_048782 | 53.20 |

|        |      |              |     |    |    |                 |                                   |       |
|--------|------|--------------|-----|----|----|-----------------|-----------------------------------|-------|
| PC0230 | 7.9  | Incomplete   | 40  | 11 | 3  | 43253 - 51183   | PHAGE_Aeromo_Aes012_NC_020879     | 55.05 |
| PC0230 | 16.5 | Incomplete   | 40  | 24 | 7  | 19147 - 35745   | PHAGE_Gordon_Attis_NC_041883      | 55.20 |
| PC0230 | 31.5 | Incomplete   | 50  | 36 | 9  | 124477 - 156049 | PHAGE_Coryne_Poushou_NC_042139    | 55.63 |
| PC0231 | 12.5 | Incomplete   | 10  | 17 | 4  | 557244 - 569805 | PHAGE_Gordon_GMA5_NC_030907       | 58.10 |
| PC0231 | 4.1  | Intact       | 109 | 7  | 0  | 1192 - 5335     | PHAGE_Enterolato_NC_001422        | 44.57 |
| PC0231 | 7.9  | Incomplete   | 40  | 11 | 3  | 83278 - 91208   | PHAGE_Vibrio_ICP3_NC_015159       | 55.05 |
| PC0231 | 16.5 | Incomplete   | 40  | 24 | 7  | 19147 - 35745   | PHAGE_Gordon_Attis_NC_041883      | 55.20 |
| PC0231 | 31.5 | Incomplete   | 50  | 36 | 9  | 2662 - 34234    | PHAGE_Coryne_Poushou_NC_042139    | 55.63 |
| PC0231 | 39.6 | Questionable | 80  | 51 | 21 | 254108 - 293801 | PHAGE_Coryne_Poushou_NC_042139    | 52.93 |
| PC0231 | 12.6 | Incomplete   | 50  | 22 | 11 | 484 - 13089     | PHAGE_Coryne_Juicebox_NC_048070   | 53.20 |
| PC0226 | 12.6 | Incomplete   | 50  | 22 | 11 | 484 - 13089     | PHAGE_Rhodoc_Sleepyhead_NC_048782 | 53.20 |
| PC0226 | 5.0  | Intact       | 95  | 7  | 0  | 286 - 5384      | PHAGE_Enterolato_NC_001422        | 44.60 |
| PC0226 | 12.5 | Incomplete   | 10  | 17 | 4  | 25885 - 38446   | PHAGE_Gordon_GMA5_NC_030907       | 58.10 |
| PC0226 | 31.5 | Incomplete   | 50  | 36 | 9  | 2662 - 34234    | PHAGE_Coryne_Poushou_NC_042139    | 55.63 |
| PC0226 | 7.9  | Incomplete   | 40  | 11 | 3  | 83278 - 91208   | PHAGE_Bacill_SPbeta_NC_001884     | 55.05 |
| PC0226 | 16.5 | Incomplete   | 40  | 24 | 7  | 1674 - 18272    | PHAGE_Gordon_Attis_NC_041883      | 55.20 |
| PC0226 | 39.6 | Questionable | 80  | 51 | 21 | 254169-293862   | PHAGE_Coryne_Poushou_NC_042139    | 52.93 |
| PC0229 | 7.9  | Incomplete   | 40  | 11 | 3  | 43253 - 51183   | PHAGE_Escher_80001_NC_027387      | 55.05 |



|        |      |              |    |    |    |                 |                                 |       |
|--------|------|--------------|----|----|----|-----------------|---------------------------------|-------|
| PC0229 | 12.6 | Incomplete   | 50 | 22 | 11 | 454767 - 467383 | PHAGE_Coryne_Juicebox_NC_048070 | 53.20 |
| PC0229 | 45   | Questionable | 90 | 53 | 21 | 53795 - 98823   | PHAGE_Coryne_Poushou_NC_042139  | 52.23 |
| PC0229 | 16.5 | Incomplete   | 40 | 24 | 7  | 19147 - 35745   | PHAGE_Gordon_Attis_NC_041883    | 55.20 |
| PC0229 | 12.5 | Incomplete   | 10 | 17 | 4  | 444033 - 456594 | PHAGE_Gordon_GMA5_NC_030907     | 58.10 |
| PC0229 | 31.5 | Incomplete   | 50 | 36 | 9  | 124477 - 156049 | PHAGE_Coryne_Poushou_NC_042139  | 55.63 |

---

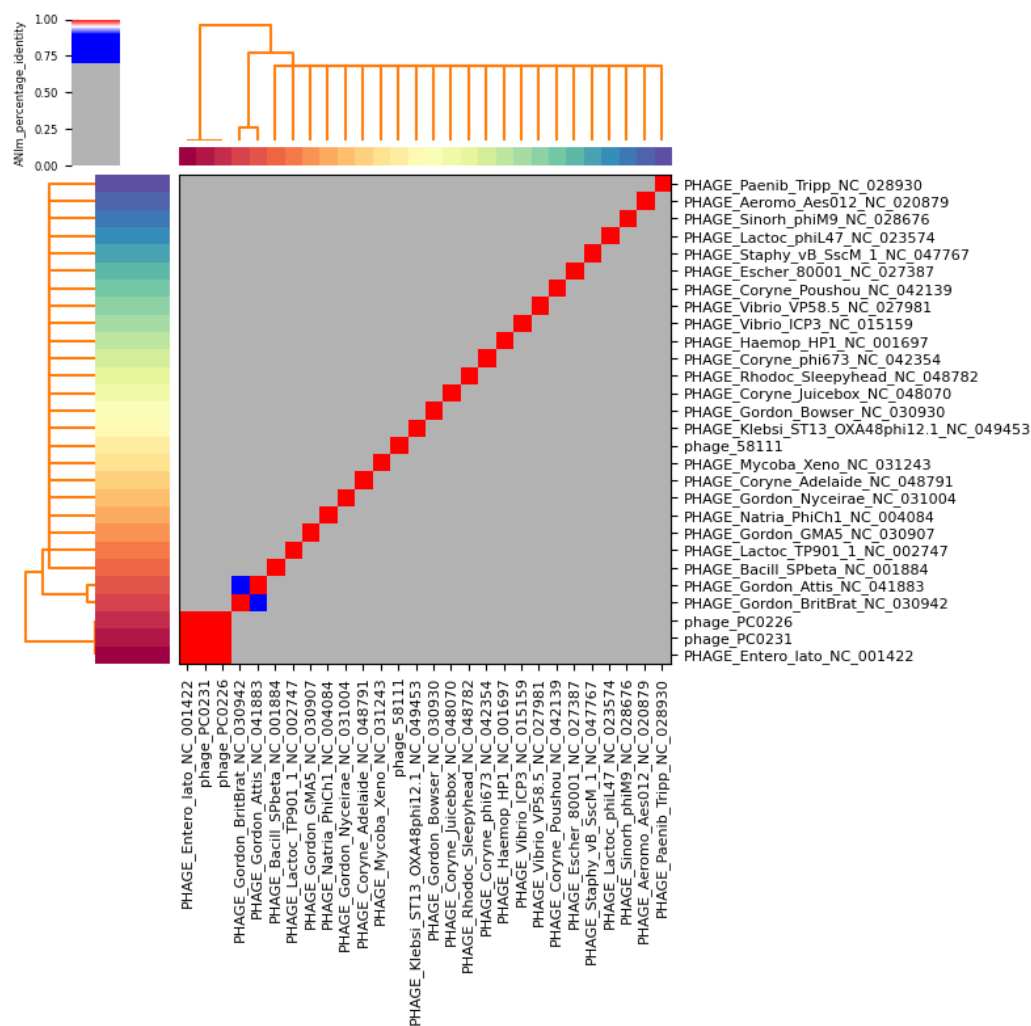

**Figure S4.** Heatmap representing the ANI percentage nucleotide identity of all matching regions between intact prophage regions of *C. rouxii* and the most common phages using PyANI v.0.2.12. The default scheme colors cells with identity > 0.95 as red, and those with < 0.95 as blue.

**Table S4.** Number of predicted IS family in each one of *C. rouxii* strain.

| Strain               | IS110 | IS21 | IS256 | IS3 | IS30 | IS5 | ISL3 |
|----------------------|-------|------|-------|-----|------|-----|------|
| FRC0190 <sup>T</sup> | 5     | 1    | 4     | 19  | 2    | 1   | 1    |
| 21395                | 6     | 1    | 4     | 15  | 2    | 1   | 1    |
| 58111                | 6     | 1    | 4     | 16  | 2    | 1   | 1    |
| 70862                | 6     | 1    | 3     | 14  | 2    | 1   | 1    |
| 70863                | 6     | 1    | 3     | 14  | 2    | 1   | 1    |
| FRC0071              | 6     | 1    | 4     | 17  | 2    | 1   | 1    |
| FRC0284              | 4     | 1    | 3     | 17  | 2    | 1   | 1    |
| FRC0297              | 5     | 1    | 3     | 11  | 2    | 1   | 1    |
| FRC0412              | 6     | 1    | 4     | 18  | 1    | 1   | 1    |
| FRC0527              | 5     | 1    | 4     | 13  | 2    | 1   | 1    |
| PC0230               | 6     | 1    | 4     | 11  | 1    | 1   | 1    |
| PC0231               | 7     | 1    | 3     | 11  | 1    | 1   | 1    |
| PC0226               | 7     | 1    | 4     | 11  | 1    | 1   | 1    |
| PC0229               | 5     | 1    | 3     | 12  | 1    | 1   | 1    |
| CS30                 | 6     | 1    | 3     | 11  | 2    | 1   | 1    |

**Table S5.** Hits found to spacer sequences in the CRISPRTarget databases.

| Strain               | Cas-Type | cas genes                                       | Number of spacers | Evidence Level | CRISPRTarget |          |                                                                |
|----------------------|----------|-------------------------------------------------|-------------------|----------------|--------------|----------|----------------------------------------------------------------|
|                      |          |                                                 |                   |                | Spacer       | IC score | Identity                                                       |
| FRC0190 <sup>T</sup> | I-E      | <i>cse1, cse2, cas7, cas5, cas6, cas1, cas2</i> | 33                | 4              | 1            | 1.0      | <i>C. diphtheriae</i> NCTC 13129                               |
|                      |          |                                                 |                   |                |              | 0.88     | <i>C. ulcerans</i> BR-AD22                                     |
|                      |          |                                                 |                   |                |              | 0.88     | Phage <i>Rhodococcus</i> REQ3                                  |
|                      |          |                                                 |                   |                | 5            | 1.0      | Phage <i>Rhodococcus</i> RRH1                                  |
|                      |          |                                                 |                   |                |              |          | <i>C. diphtheriae</i> BH8                                      |
|                      |          |                                                 |                   |                | 6            | 0.82     | <i>C. ulcerans</i> 0102                                        |
|                      |          |                                                 |                   |                | 7            | 0.82     | <i>C. ulcerans</i> BR-AD22                                     |
| 21395                | I-E      | <i>cse1, cse2, cas7, cas5, cas6, cas1, cas2</i> | 29                | 4              | 29           | 1.0      | <i>C. diphtheriae</i> C7 (beta)                                |
|                      |          |                                                 |                   |                | 1            | 1.0      | <i>C. ulcerans</i> FRC58                                       |
|                      |          |                                                 |                   |                | 2            | 1.0      | Phage <i>Corynebacterium</i> BFK20                             |
|                      |          |                                                 |                   |                |              |          | <i>C. diphtheriae</i> PW8, C7 (beta) and CDCE 8392             |
|                      |          |                                                 |                   |                | 3            | 0.97     | Prophage 166099 GID2649121                                     |
|                      |          |                                                 |                   |                |              |          | <i>C. diphtheriae</i> PW8, CDC E8392, C7 (beta) and NCTC 13129 |
|                      |          |                                                 |                   |                |              |          | Phage <i>Corynebacterium</i> BFK20                             |
|                      |          |                                                 |                   |                | 4            | 1.0      | <i>C. diphtheriae</i> C7 (beta) and NCTC13129                  |
|                      |          |                                                 |                   |                |              |          | Phage <i>Corynebacterium</i> BFK20                             |
|                      |          |                                                 |                   |                | 5            | 1.0      | Phage <i>Corynebacterium</i> LGCM                              |
|                      |          |                                                 |                   |                |              |          | <i>C. pseudotuberculosis</i> 31 to 36, 38, 39, and 48          |
|                      |          |                                                 |                   |                | 6            | 0.97     | <i>C. diphtheriae</i> CDC E8392, C7 (beta), NCTC 13129         |
|                      |          |                                                 |                   |                |              |          | Prophage 166106 GID2650449                                     |
|                      |          |                                                 |                   |                |              |          | Phage <i>Corynebacterium</i> BFK20                             |

|  |  |  |  |  |  |  |  |  |  |  |  |  |  |  |  |  |  |  |  |  |  |  |  |  |  |  |  |  |  |  |  |  |  |  |  |  |  |  |  |  |  |  |  |  |  |  |  |  |  |  |  |  |  |  |  |  |  |  |  |  |  |  |  |  |  |  |  |  |  |  |  |  |  |  |  |  |  |  |  |  |  |  |  |  |  |  |  |  |  |  |  |  |  |  |  |  |  |  |  |  |  |  |  |  |  |  |  |  |  |  |  |  |  |  |  |  |  |  |  |  |  |  |  |  |  |  |  |  |  |  |  |  |  |  |  |  |  |  |  |  |  |  |  |  |  |  |  |  |  |  |  |  |  |  |  |  |  |  |  |  |  |  |  |  |  |  |  |  |  |  |  |  |  |  |  |  |  |  |  |  |  |  |  |  |  |  |  |  |  |  |  |  |  |  |  |  |  |  |  |  |  |  |  |  |  |  |  |  |  |  |  |  |  |  |  |  |  |  |  |  |  |  |  |  |  |  |  |  |  |  |  |  |  |  |  |  |  |  |  |  |  |  |  |  |  |  |  |  |  |  |  |  |  |  |  |  |  |  |  |  |  |  |  |  |  |  |  |  |  |  |  |  |  |  |  |  |  |  |  |  |  |  |  |  |  |  |  |  |  |  |  |  |  |  |  |  |  |  |  |  |  |  |  |  |  |  |  |  |  |  |  |  |  |  |  |  |  |  |  |  |  |  |  |  |  |  |  |  |  |  |  |  |  |  |  |  |  |  |  |  |  |  |  |  |  |  |  |  |  |  |  |  |  |  |  |  |  |  |  |  |  |  |  |  |  |  |  |  |  |  |  |  |  |  |  |  |  |  |  |  |  |  |  |  |  |  |  |  |  |  |  |  |  |  |  |  |  |  |  |  |  |  |  |  |  |  |  |  |  |  |  |  |  |  |  |  |  |  |  |  |  |  |  |  |  |  |  |  |  |  |  |  |  |  |  |  |  |  |  |  |  |  |  |  |  |  |  |  |  |  |  |  |  |  |  |  |  |  |  |  |  |  |  |  |  |  |  |  |  |  |  |  |  |  |  |  |  |  |  |  |  |  |  |  |  |  |  |  |  |  |  |  |  |  |  |  |  |  |  |  |  |  |  |  |  |  |  |  |  |  |  |  |  |  |  |  |  |  |  |  |  |  |  |  |  |  |  |  |  |  |  |  |  |  |  |  |  |  |  |  |  |  |  |  |  |  |  |  |  |  |  |  |  |  |  |  |  |
|--|--|--|--|--|--|--|--|--|--|--|--|--|--|--|--|--|--|--|--|--|--|--|--|--|--|--|--|--|--|--|--|--|--|--|--|--|--|--|--|--|--|--|--|--|--|--|--|--|--|--|--|--|--|--|--|--|--|--|--|--|--|--|--|--|--|--|--|--|--|--|--|--|--|--|--|--|--|--|--|--|--|--|--|--|--|--|--|--|--|--|--|--|--|--|--|--|--|--|--|--|--|--|--|--|--|--|--|--|--|--|--|--|--|--|--|--|--|--|--|--|--|--|--|--|--|--|--|--|--|--|--|--|--|--|--|--|--|--|--|--|--|--|--|--|--|--|--|--|--|--|--|--|--|--|--|--|--|--|--|--|--|--|--|--|--|--|--|--|--|--|--|--|--|--|--|--|--|--|--|--|--|--|--|--|--|--|--|--|--|--|--|--|--|--|--|--|--|--|--|--|--|--|--|--|--|--|--|--|--|--|--|--|--|--|--|--|--|--|--|--|--|--|--|--|--|--|--|--|--|--|--|--|--|--|--|--|--|--|--|--|--|--|--|--|--|--|--|--|--|--|--|--|--|--|--|--|--|--|--|--|--|--|--|--|--|--|--|--|--|--|--|--|--|--|--|--|--|--|--|--|--|--|--|--|--|--|--|--|--|--|--|--|--|--|--|--|--|--|--|--|--|--|--|--|--|--|--|--|--|--|--|--|--|--|--|--|--|--|--|--|--|--|--|--|--|--|--|--|--|--|--|--|--|--|--|--|--|--|--|--|--|--|--|--|--|--|--|--|--|--|--|--|--|--|--|--|--|--|--|--|--|--|--|--|--|--|--|--|--|--|--|--|--|--|--|--|--|--|--|--|--|--|--|--|--|--|--|--|--|--|--|--|--|--|--|--|--|--|--|--|--|--|--|--|--|--|--|--|--|--|--|--|--|--|--|--|--|--|--|--|--|--|--|--|--|--|--|--|--|--|--|--|--|--|--|--|--|--|--|--|--|--|--|--|--|--|--|--|--|--|--|--|--|--|--|--|--|--|--|--|--|--|--|--|--|--|--|--|--|--|--|--|--|--|--|--|--|--|--|--|--|--|--|--|--|--|--|--|--|--|--|--|--|--|--|--|--|--|--|--|--|--|--|--|--|--|--|--|--|--|--|--|--|--|--|--|--|--|--|--|--|--|--|--|--|--|--|--|--|--|--|--|--|--|--|--|--|--|--|--|--|--|--|--|--|--|--|--|--|--|--|--|--|--|--|--|--|
|  |  |  |  |  |  |  |  |  |  |  |  |  |  |  |  |  |  |  |  |  |  |  |  |  |  |  |  |  |  |  |  |  |  |  |  |  |  |  |  |  |  |  |  |  |  |  |  |  |  |  |  |  |  |  |  |  |  |  |  |  |  |  |  |  |  |  |  |  |  |  |  |  |  |  |  |  |  |  |  |  |  |  |  |  |  |  |  |  |  |  |  |  |  |  |  |  |  |  |  |  |  |  |  |  |  |  |  |  |  |  |  |  |  |  |  |  |  |  |  |  |  |  |  |  |  |  |  |  |  |  |  |  |  |  |  |  |  |  |  |  |  |  |  |  |  |  |  |  |  |  |  |  |  |  |  |  |  |  |  |  |  |  |  |  |  |  |  |  |  |  |  |  |  |  |  |  |  |  |  |  |  |  |  |  |  |  |  |  |  |  |  |  |  |  |  |  |  |  |  |  |  |  |  |  |  |  |  |  |  |  |  |  |  |  |  |  |  |  |  |  |  |  |  |  |  |  |  |  |  |  |  |  |  |  |  |  |  |  |  |  |  |  |  |  |  |  |  |  |  |  |  |  |  |  |  |  |  |  |  |  |  |  |  |  |  |  |  |  |  |  |  |  |  |  |  |  |  |  |  |  |  |  |  |  |  |  |  |  |  |  |  |  |  |  |  |  |  |  |  |  |  |  |  |  |  |  |  |  |  |  |  |  |  |  |  |  |  |  |  |  |  |  |  |  |  |  |  |  |  |  |  |  |  |  |  |  |  |  |  |  |  |  |  |  |  |  |  |  |  |  |  |  |  |  |  |  |  |  |  |  |  |  |  |  |  |  |  |  |  |  |  |  |  |  |  |  |  |  |  |  |  |  |  |  |  |  |  |  |  |  |  |  |  |  |  |  |  |  |  |  |  |  |  |  |  |  |  |  |  |  |  |  |  |  |  |  |  |  |  |  |  |  |  |  |  |  |  |  |  |  |  |  |  |  |  |  |  |  |  |  |  |  |  |  |  |  |  |  |  |  |  |  |  |  |  |  |  |  |  |  |  |  |  |  |  |  |  |  |  |  |  |  |  |  |  |  |  |  |  |  |  |  |  |  |  |  |  |  |  |  |  |  |  |  |  |  |  |  |  |  |  |  |  |  |  |  |  |  |  |  |  |  |  |  |  |  |  |  |  |  |  |  |  |  |  |  |  |  |  |  |  |  |  |  |  |  |  |  |  |  |  |  |  |  |  |  |  |  |  |  |  |  |  |  |  |  |  |
|--|--|--|--|--|--|--|--|--|--|--|--|--|--|--|--|--|--|--|--|--|--|--|--|--|--|--|--|--|--|--|--|--|--|--|--|--|--|--|--|--|--|--|--|--|--|--|--|--|--|--|--|--|--|--|--|--|--|--|--|--|--|--|--|--|--|--|--|--|--|--|--|--|--|--|--|--|--|--|--|--|--|--|--|--|--|--|--|--|--|--|--|--|--|--|--|--|--|--|--|--|--|--|--|--|--|--|--|--|--|--|--|--|--|--|--|--|--|--|--|--|--|--|--|--|--|--|--|--|--|--|--|--|--|--|--|--|--|--|--|--|--|--|--|--|--|--|--|--|--|--|--|--|--|--|--|--|--|--|--|--|--|--|--|--|--|--|--|--|--|--|--|--|--|--|--|--|--|--|--|--|--|--|--|--|--|--|--|--|--|--|--|--|--|--|--|--|--|--|--|--|--|--|--|--|--|--|--|--|--|--|--|--|--|--|--|--|--|--|--|--|--|--|--|--|--|--|--|--|--|--|--|--|--|--|--|--|--|--|--|--|--|--|--|--|--|--|--|--|--|--|--|--|--|--|--|--|--|--|--|--|--|--|--|--|--|--|--|--|--|--|--|--|--|--|--|--|--|--|--|--|--|--|--|--|--|--|--|--|--|--|--|--|--|--|--|--|--|--|--|--|--|--|--|--|--|--|--|--|--|--|--|--|--|--|--|--|--|--|--|--|--|--|--|--|--|--|--|--|--|--|--|--|--|--|--|--|--|--|--|--|--|--|--|--|--|--|--|--|--|--|--|--|--|--|--|--|--|--|--|--|--|--|--|--|--|--|--|--|--|--|--|--|--|--|--|--|--|--|--|--|--|--|--|--|--|--|--|--|--|--|--|--|--|--|--|--|--|--|--|--|--|--|--|--|--|--|--|--|--|--|--|--|--|--|--|--|--|--|--|--|--|--|--|--|--|--|--|--|--|--|--|--|--|--|--|--|--|--|--|--|--|--|--|--|--|--|--|--|--|--|--|--|--|--|--|--|--|--|--|--|--|--|--|--|--|--|--|--|--|--|--|--|--|--|--|--|--|--|--|--|--|--|--|--|--|--|--|--|--|--|--|--|--|--|--|--|--|--|--|--|--|--|--|--|--|--|--|--|--|--|--|--|--|--|--|--|--|--|--|--|--|--|--|--|--|--|--|--|--|--|--|--|--|--|--|--|--|--|--|--|--|--|--|--|--|--|--|--|--|--|--|--|--|--|--|--|--|

|         |     |                                                 |    |   |  |    |      |                                                |
|---------|-----|-------------------------------------------------|----|---|--|----|------|------------------------------------------------|
|         |     |                                                 |    |   |  | 2  | 1.0  | <i>C. diphtheriae</i> NCTC 11397 and C7 (beta) |
|         |     |                                                 |    |   |  | 15 | 0.94 | <i>C. ulcerans</i> 131001 and 210932           |
|         |     |                                                 |    |   |  |    |      | Prophage <i>Staphylococcus</i> phi7401PVL      |
| 70863   | I-E | <i>cse1, cse2, cas7, cas5, cas6, cas1, cas2</i> | 16 | 4 |  | 2  | 0.82 | Phage <i>Rhodococcus</i> RRH1                  |
|         |     |                                                 |    |   |  | 16 | 0.94 | <i>C. diphtheriae</i> BH8                      |
|         |     |                                                 |    |   |  |    |      | Prophage <i>Staphylococcus</i> phi7401PVL      |
| FRC0071 | I-E | <i>cse1, cse2, cas7, cas5, cas6, cas1, cas2</i> | 29 | 4 |  | 2  | 0.82 | <i>C. ulcerans</i> 131001 and 210932           |
|         |     |                                                 |    |   |  |    |      | Phage <i>Rhodococcus</i> REQ3                  |
|         |     |                                                 |    |   |  | 3  | 0.95 | <i>C. diphtheriae</i> BR-AD22 and 0102         |
|         |     |                                                 |    |   |  |    |      | Phage <i>Rhodococcus</i> RRH1                  |
|         |     |                                                 |    |   |  | 4  | 1.0  | <i>C. diphtheriae</i> 31A                      |
|         |     |                                                 |    |   |  |    |      | Phage <i>Rhodococcus</i> RRH1                  |
|         |     |                                                 |    |   |  | 5  | 0.82 | <i>C. diphtheriae</i> BR-AD22                  |
|         |     |                                                 |    |   |  |    |      | Phage <i>Rhodococcus</i> RRH1                  |
|         |     |                                                 |    |   |  | 10 | 0.94 | <i>C. diphtheriae</i> BH8                      |
|         |     |                                                 |    |   |  |    |      | <i>C. diphtheriae</i> C7 (beta)                |
| FRC0297 | I-E | <i>cse1, cse2, cas7, cas5, cas6, cas1, cas2</i> | 17 | 4 |  | 20 | 0.88 | Phage <i>Rhodococcus</i> RRH1                  |
|         |     |                                                 |    |   |  |    |      | <i>C. diphtheriae</i> BH8                      |
|         |     |                                                 |    |   |  | 21 | 0.88 | Phage <i>Rhodococcus</i> RRH1                  |
|         |     |                                                 |    |   |  |    |      | <i>C. diphtheriae</i> BH8                      |
|         |     |                                                 |    |   |  | 9  | 0.94 | Prophage <i>Staphylococcus</i> phi7401PVL      |
|         |     |                                                 |    |   |  | 12 | 0.94 | <i>C. ulcerans</i> 131001, 210932              |
|         |     |                                                 |    |   |  |    |      | Phage <i>Rhodococcus</i> RRH1                  |

|                                                                            |  |  |  |  |    |      |                                                |
|----------------------------------------------------------------------------|--|--|--|--|----|------|------------------------------------------------|
|                                                                            |  |  |  |  |    |      | <i>C. diphtheriae</i> BH8                      |
|                                                                            |  |  |  |  | 13 | 0.82 | <i>C. diphtheriae</i> NCTC 11397 and C7 (beta) |
|                                                                            |  |  |  |  | 17 | 0.88 | Phage <i>Rhodococcus</i> RRH1                  |
| <i>C. diphtheriae</i> BH8                                                  |  |  |  |  |    |      |                                                |
| FRC0412      I-E <i>cse1, cse2, cas7, cas5, cas6, cas1, cas2</i> 70      4 |  |  |  |  | 13 | 0.88 | Phage <i>Rhodococcus</i> RRH1                  |
|                                                                            |  |  |  |  |    |      | <i>C. diphtheriae</i> BH8                      |
|                                                                            |  |  |  |  | 14 | 0.88 | Phage <i>Rhodococcus</i> RRH1                  |
|                                                                            |  |  |  |  |    |      | <i>C. diphtheriae</i> BH8                      |
|                                                                            |  |  |  |  | 21 | 0.94 | <i>C. diphtheriae</i> NCTC 11397 and C7 (beta) |
|                                                                            |  |  |  |  | 65 | 0.82 | Phage <i>Rhodococcus</i> RRH1                  |
|                                                                            |  |  |  |  |    |      | <i>C. diphtheriae</i> NCTC 13129               |
|                                                                            |  |  |  |  | 66 | 0.94 | Phage <i>Rhodococcus</i> RRH1                  |
|                                                                            |  |  |  |  |    |      | <i>C. diphtheriae</i> BH8                      |
|                                                                            |  |  |  |  | 67 | 1.0  | Phage <i>Rhodococcus</i> RRH1                  |
|                                                                            |  |  |  |  |    |      | <i>C. diphtheriae</i> NCTC 13129               |
|                                                                            |  |  |  |  | 68 | 1.0  | Phage <i>Rhodococcus</i> RRH1                  |
|                                                                            |  |  |  |  |    |      | <i>C. diphtheriae</i> NCTC 13129 and BH8       |
|                                                                            |  |  |  |  | 69 | 1.0  | Phage <i>Rhodococcus</i> RRH1                  |
|                                                                            |  |  |  |  |    |      | <i>C. diphtheriae</i> NCTC 13129 and BH8       |
|                                                                            |  |  |  |  | 70 | 1.0  | Phage <i>Rhodococcus</i> RRH1                  |
| <i>C. diphtheriae</i> NCTC 13129 and BH8                                   |  |  |  |  |    |      |                                                |
| FRC0527      I-E <i>cse1, cse2, cas7, cas5, cas6, cas1, cas2</i> 22      4 |  |  |  |  | 6  | 0.88 | Phage <i>Rhodococcus</i> RRH1                  |
|                                                                            |  |  |  |  |    |      | <i>C. diphtheriae</i> BH8                      |
|                                                                            |  |  |  |  | 20 | 0.88 | Phage <i>Rhodococcus</i> RRH1                  |

|        |     |                                                 |   |   |  |    |      |                                                                |
|--------|-----|-------------------------------------------------|---|---|--|----|------|----------------------------------------------------------------|
|        |     |                                                 |   |   |  |    |      | <i>C. diphtheriae</i> BH8                                      |
|        |     |                                                 |   |   |  | 21 | 0.88 | Phage <i>Rhodococcus</i> RRH1                                  |
|        |     |                                                 |   |   |  |    |      | <i>C. diphtheriae</i> BH8                                      |
|        |     |                                                 |   |   |  | 22 | 0.82 | Phage <i>Rhodococcus</i> RRH1                                  |
|        |     |                                                 |   |   |  |    |      | <i>C. diphtheriae</i> BH8                                      |
|        |     |                                                 |   |   |  |    |      |                                                                |
| PC0230 | I-E | <i>cse1, cse2, cas7, cas5, cas6, cas1, cas2</i> | 8 | 4 |  | 1  | 0.94 | <i>C. diphtheriae</i> PW8, C7 (beta) and NCTC 13129            |
|        |     |                                                 |   |   |  |    |      | Prophage 166106 GID2650479                                     |
|        |     |                                                 |   |   |  |    |      | Phage <i>Corynebacterium</i> BFK20                             |
|        |     |                                                 |   |   |  |    | 0.82 | <i>C. ulcerans</i> FRC58                                       |
|        |     |                                                 |   |   |  | 7  | 0.88 | Prophage <i>Staphylococcus</i> phi7401PVL                      |
|        |     |                                                 |   |   |  |    |      | <i>C. ulcerans</i> 131001, 210932                              |
| PC0231 | I-E | <i>cse1, cse2, cas7, cas5, cas6, cas1, cas2</i> | 7 | 4 |  | 1  | 0.91 | <i>C. diphtheriae</i> PW8, CDCE 8392, C7 (beta) and NCTC 13129 |
|        |     |                                                 |   |   |  |    |      | Prophage 166106 GID2650479                                     |
|        |     |                                                 |   |   |  |    |      | Phage <i>Corynebacterium</i> BFK20                             |
|        |     |                                                 |   |   |  | 6  | 0.85 | Prophage <i>Staphylococcus</i> phi7401PVL                      |
|        |     |                                                 |   |   |  |    |      | <i>C. ulcerans</i> 131001, 210932                              |
|        |     |                                                 |   |   |  |    |      |                                                                |
| PC0226 | I-E | <i>cse1, cse2, cas7, cas5, cas6, cas1, cas2</i> | 8 | 4 |  | 1  | 0.94 | <i>C. diphtheriae</i> PW8, CDCE 8392, C7 (beta) and NCTC 13129 |
|        |     |                                                 |   |   |  |    |      | Prophage 166106 GID2650449                                     |
|        |     |                                                 |   |   |  |    |      | Phage <i>Corynebacterium</i> BFK20                             |
|        |     |                                                 |   |   |  |    | 0.82 | <i>C. ulcerans</i> FRC58                                       |
|        |     |                                                 |   |   |  | 7  | 0.88 | Prophage <i>Staphylococcus</i> phi7401PVL                      |
|        |     |                                                 |   |   |  |    |      | <i>C. ulcerans</i> 131001, 210932                              |
| PC0229 | I-E | <i>cse1, cse2, cas7, cas5, cas6, cas1, cas2</i> | 8 | 4 |  | 2  | 0.88 | Prophage <i>Staphylococcus</i> phi7401PVL                      |
|        |     |                                                 |   |   |  |    |      | <i>C. ulcerans</i> 131001, 210932                              |



|  |      |      |                                                                |
|--|------|------|----------------------------------------------------------------|
|  | 8    | 0.94 | <i>C. diphtheriae</i> PW8, CDCE 8392, C7 (beta) and NCTC 13129 |
|  |      |      | Prophage 166106 GID2650449                                     |
|  |      |      | Phage <i>Corynebacterium</i> BFK20                             |
|  | 0.82 |      | <i>C. ulcerans</i> FRC58                                       |

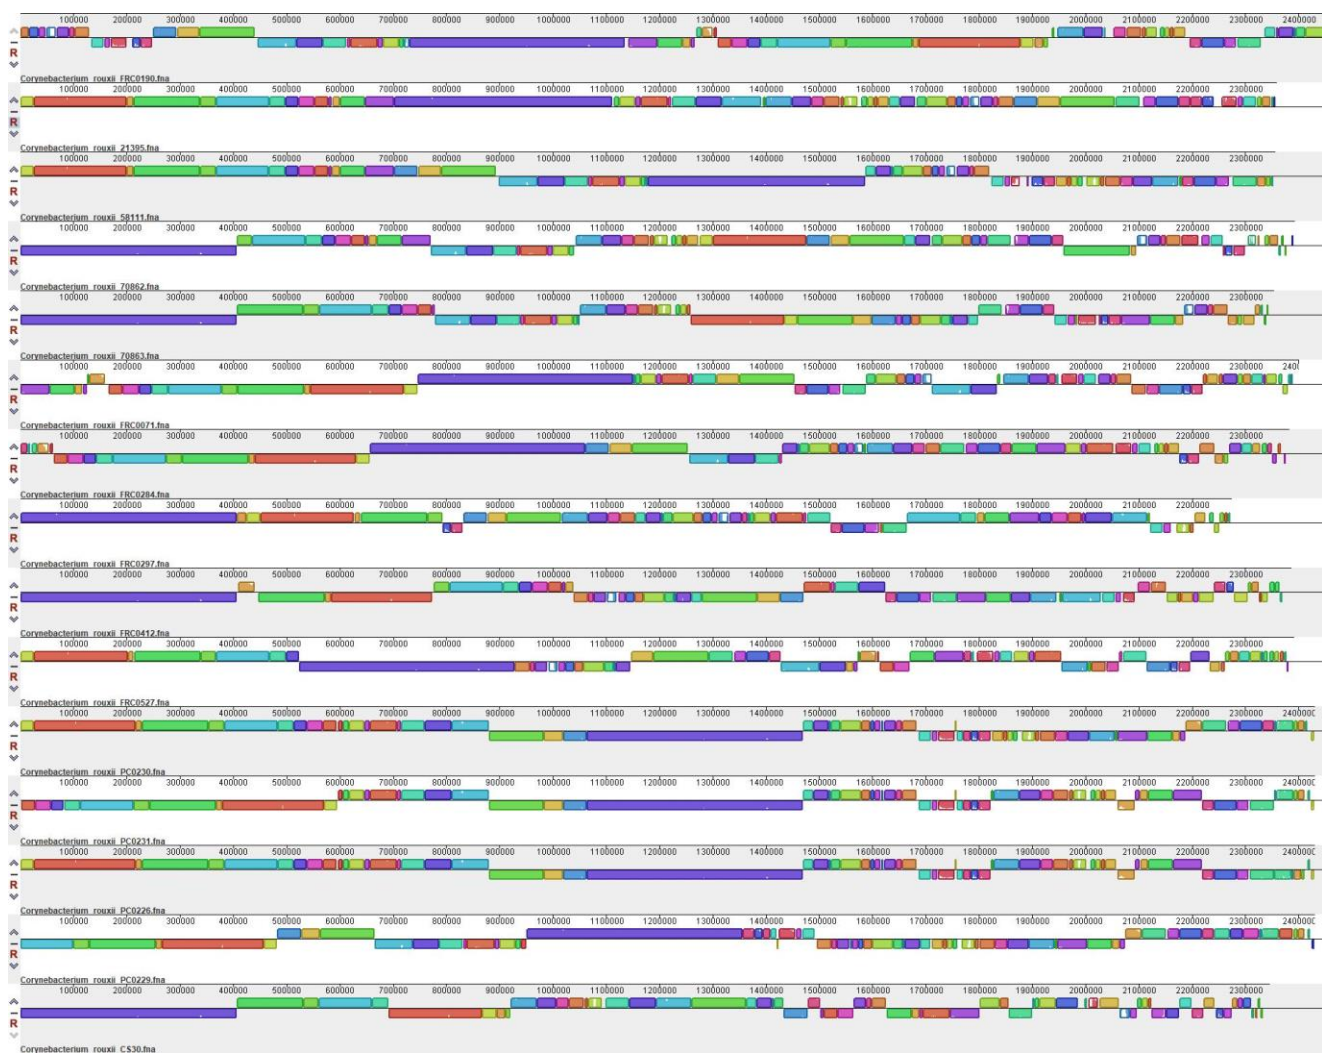

**Figure S5.** Gene synteny analysis using the software Mauve. Each contiguously colored region is a locally collinear block that has passed through evolution for inversions, translocations, or deletion.
